# Supplementary material for: In Vitro and In Silico Study of the α-Glucosidase and Lipase Inhibitory Activities of Chemical Constituents from Piper cumanense (Piperaceae) and Synthetic Analogs
Source: MDPI journal article supplement (doi:10.3390/plants11172188), 2022-08-24
Supplement: s1 [file s1]

Article

# In Vitro and In Silico Study of the $\alpha$ -Glucosidase and Lipase Inhibitory Activities of Chemical Constituents from *Piper cumanense* (Piperaceae) and Synthetic Analogs

Juliet A. Prieto-Rodríguez <sup>1,\*</sup>, Kevin P. Lévuok-Mena <sup>1</sup>, Juan C. Cardozo-Muñoz <sup>2</sup>, Jorge E. Parra-Amin <sup>3</sup>, Fabián Lopez-Vallejo <sup>4</sup>, Luis E. Cuca-Suárez <sup>2</sup> and Oscar J. Patiño-Ladino <sup>2</sup>

<sup>1</sup> Departamento de Química, Facultad de Ciencias, Pontificia Universidad Javeriana, Bogotá 110231, Colombia

<sup>2</sup> Departamento de Química, Facultad de Ciencias, Universidad Nacional de Colombia, Sede Bogotá, Bogotá 111321, Colombia

<sup>3</sup> Facultad de Ciencias, Universidad de Ciencias Aplicadas y Ambientales, Bogotá 111166, Colombia

<sup>4</sup> Departamento de Física y Química, Facultad de Ciencias Exactas y Naturales, Universidad Nacional de Colombia-Sede Manizales, Kilómetro 9 vía al aeropuerto, La Nubia, Manizales 170003, Colombia

\* Correspondence: juliet.prieto@javeriana.edu.co; Tel.: +57-6013208320 (ext. 4124)

## Supplementary Materials

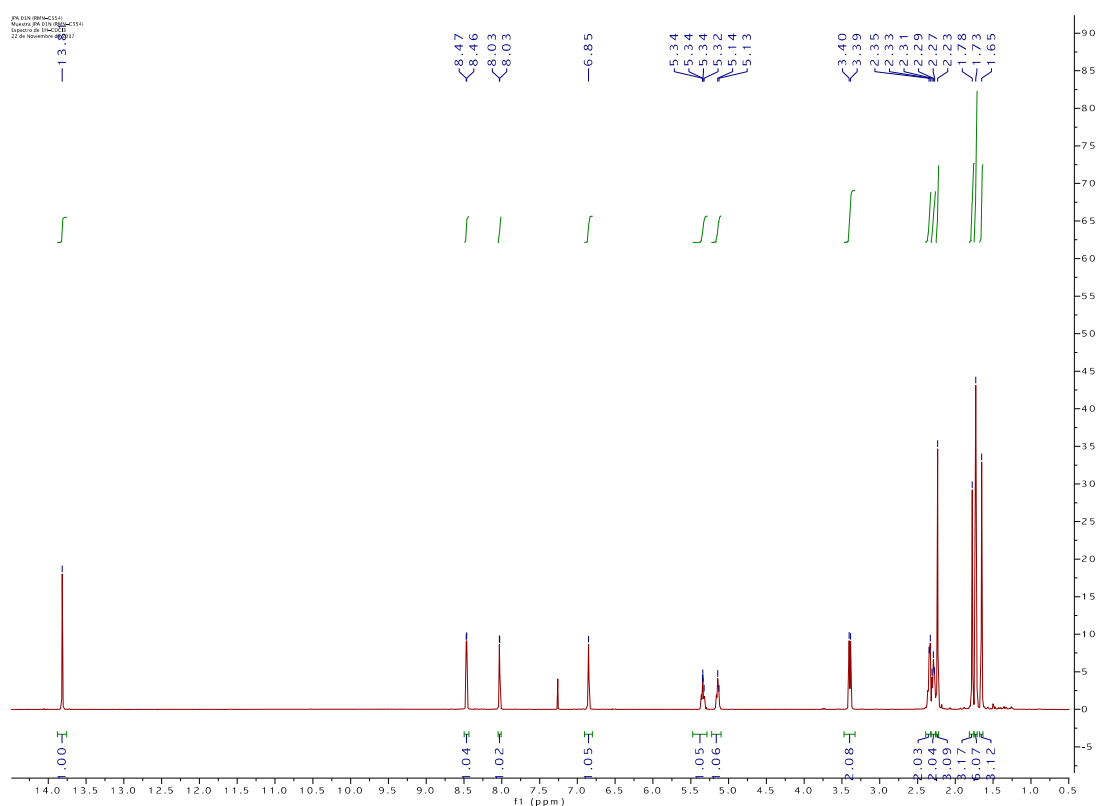

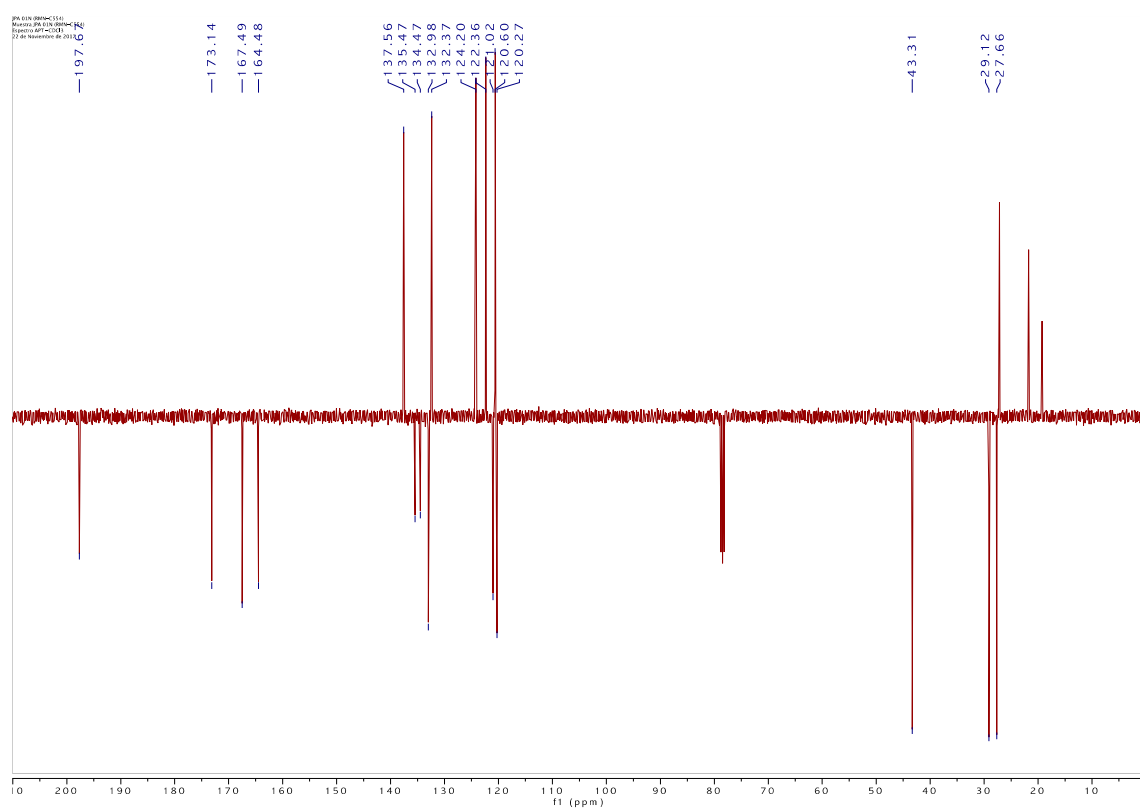

Figure S2. APT spectra of (2'E) Cumenic acid (1).

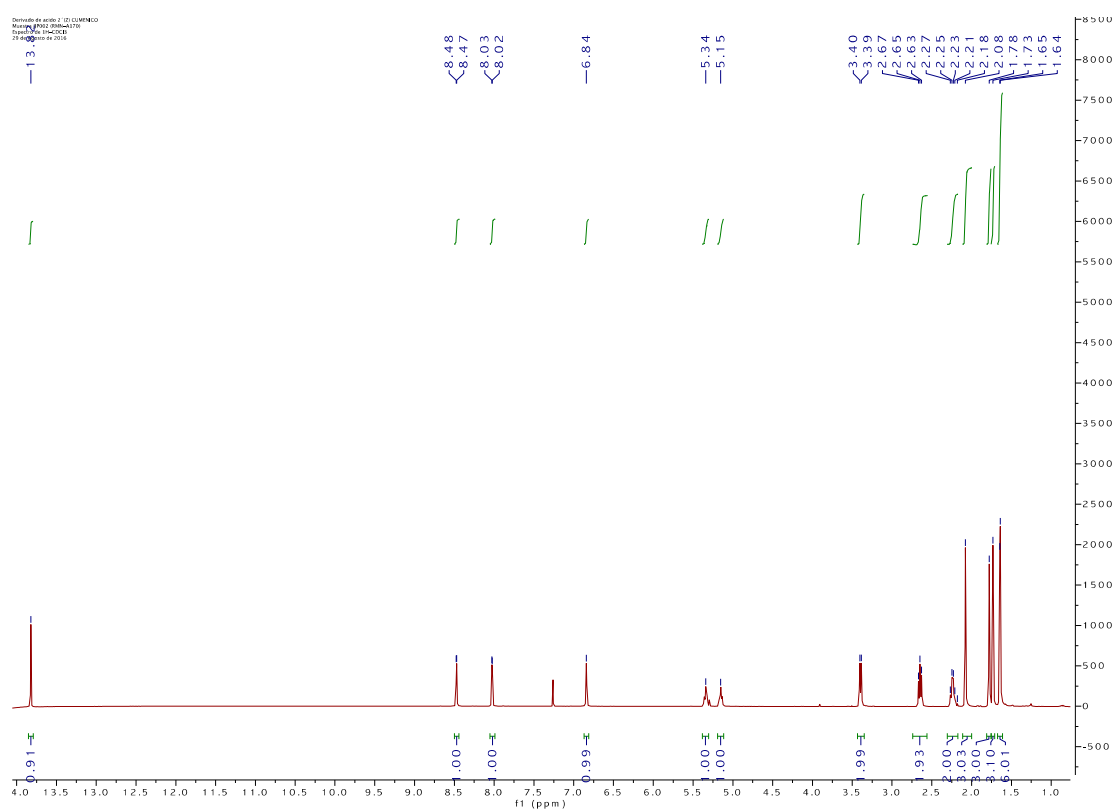Figure S3. <sup>1</sup>H-NMR spectra of (2'Z) Cumenic acid (2).

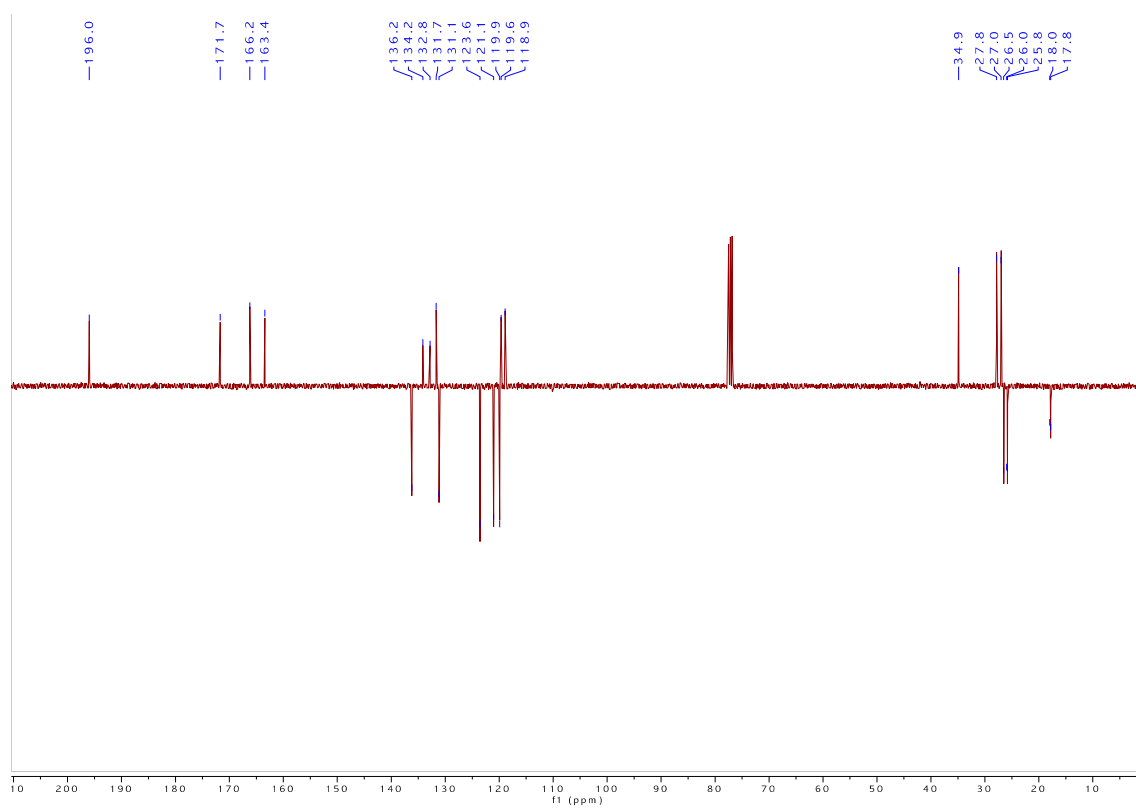

Figure S4. APT spectra of (2'Z) Cumenic acid (2).

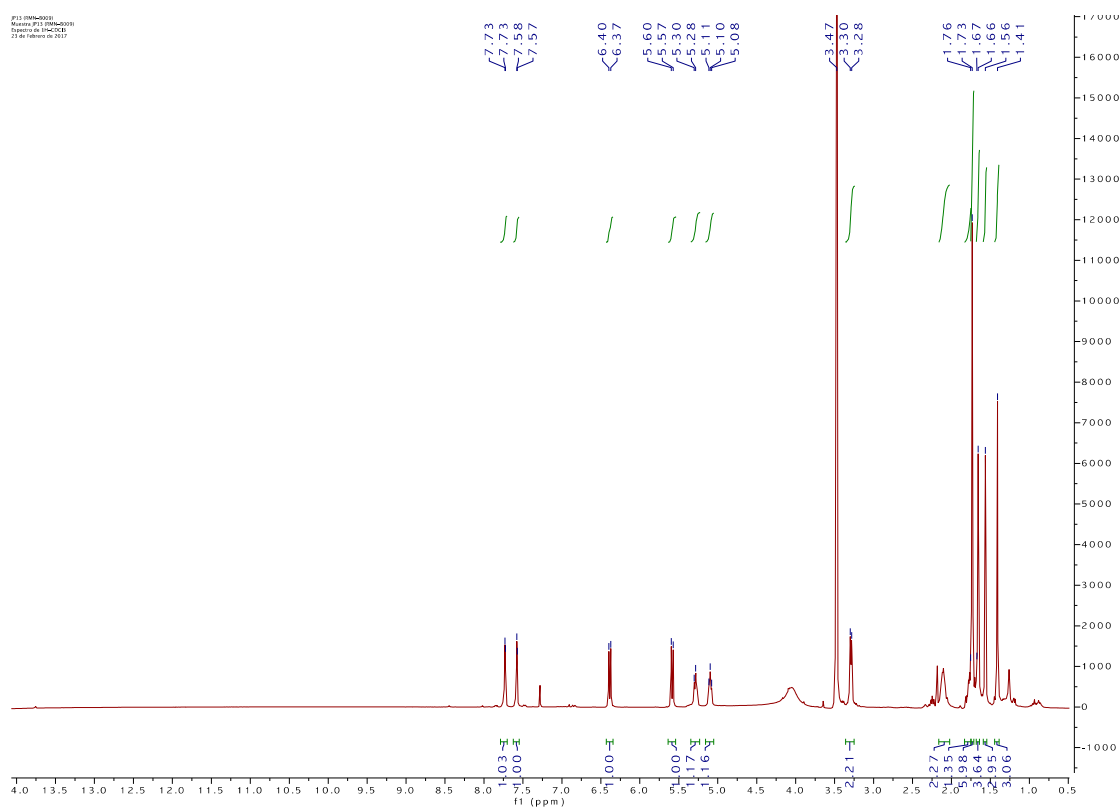Figure S5.  $^1\text{H}$ -NMR spectra of Gaudichaudianic acid (3).

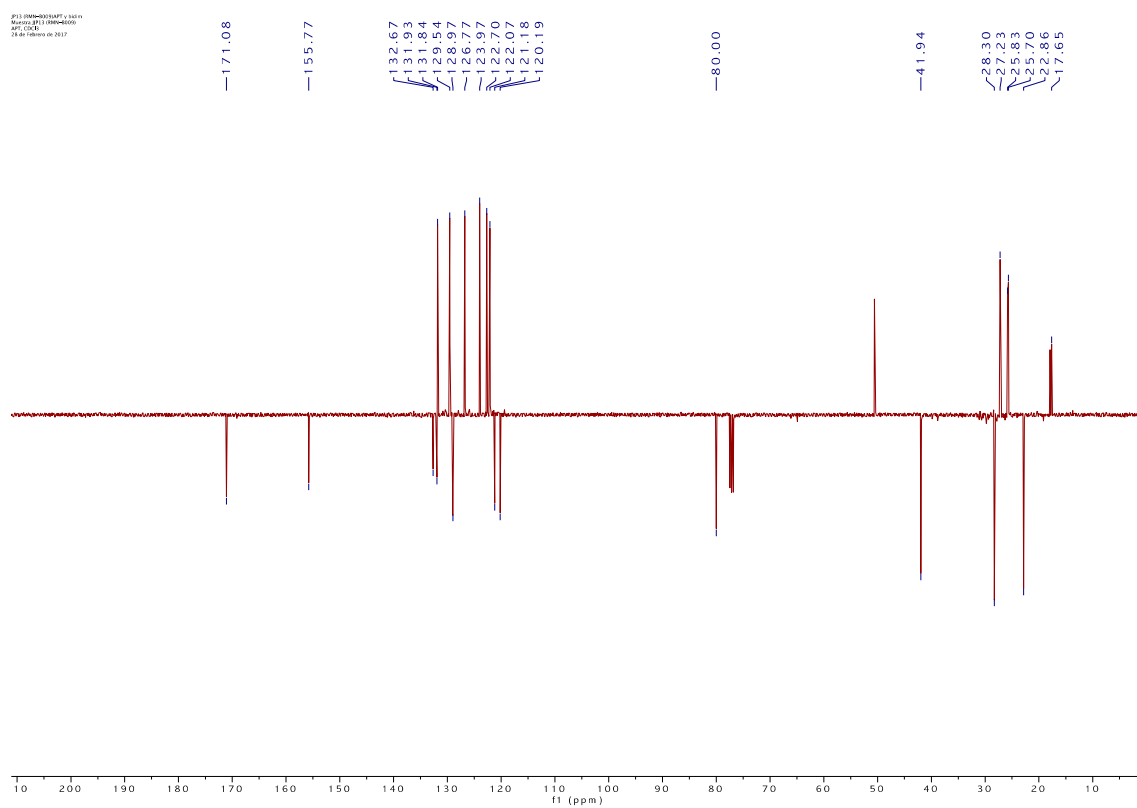

Figure S6. APT spectra of Gaudichaudianic acid (3).

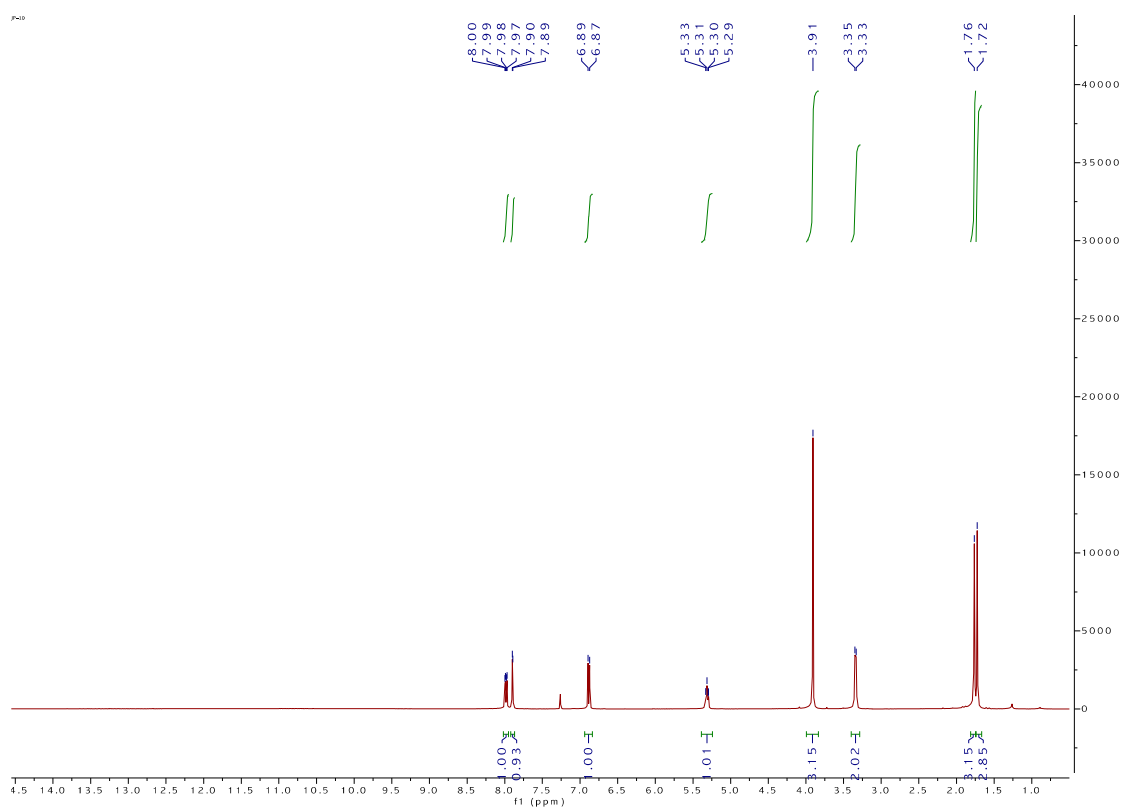Figure S7.  $^1\text{H}$ -NMR spectra of 4-Methoxy-3-(3'-methyl-2-butenyl)benzoic acid (4).

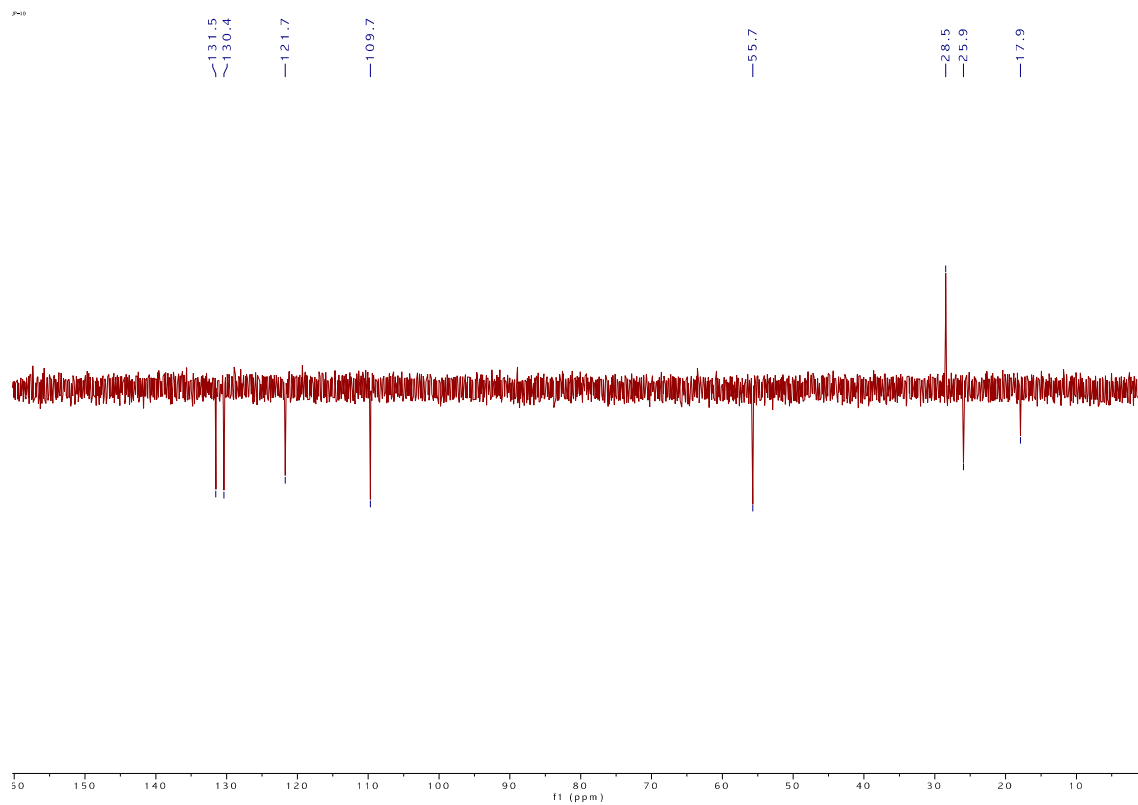

Figure S8. APT spectra of 4-Methoxy-3-(3'-methyl-2-butenyl)benzoic acid (4).

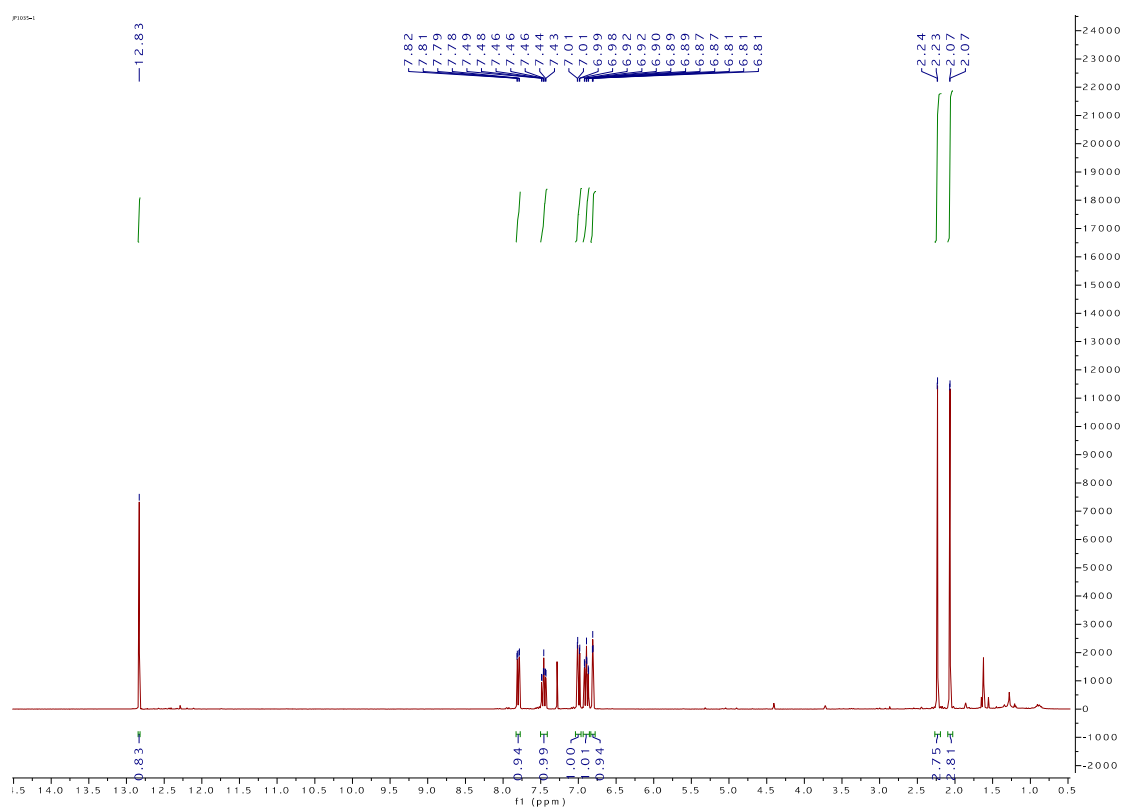

Figure S9. <sup>1</sup>H-NMR spectra of 1-(2-Hydroxy-phenyl)-3-methyl-but-2-en-1-one (5).

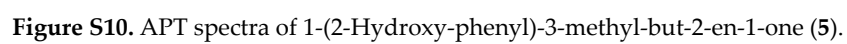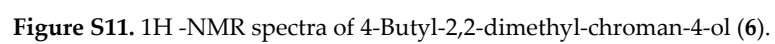

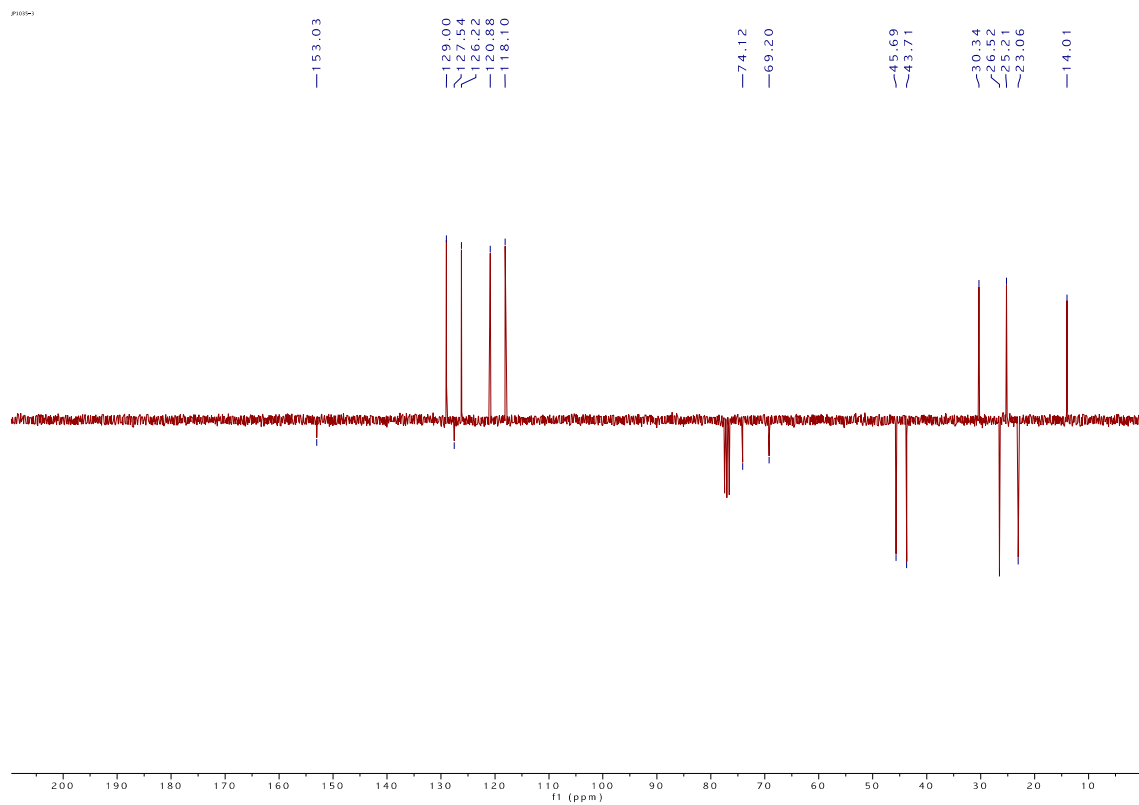

Figure S12. APT spectra of 4-Butyl-2,2-dimethyl-chroman-4-ol (6).

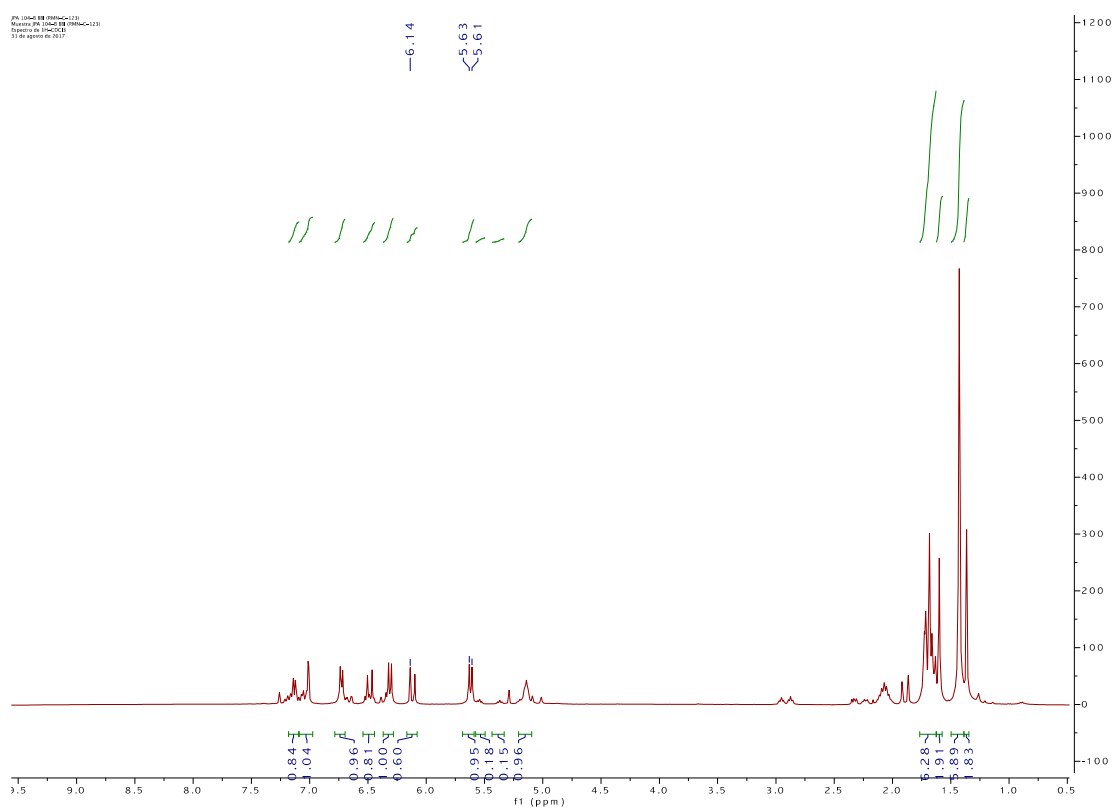

Figure S13.  $^1\text{H}$ -NMR spectra of 1-(2,2-dimethyl-chroman-6-yl)-3,7-dimethyl-octa-2,6-dien-1-ol (7)

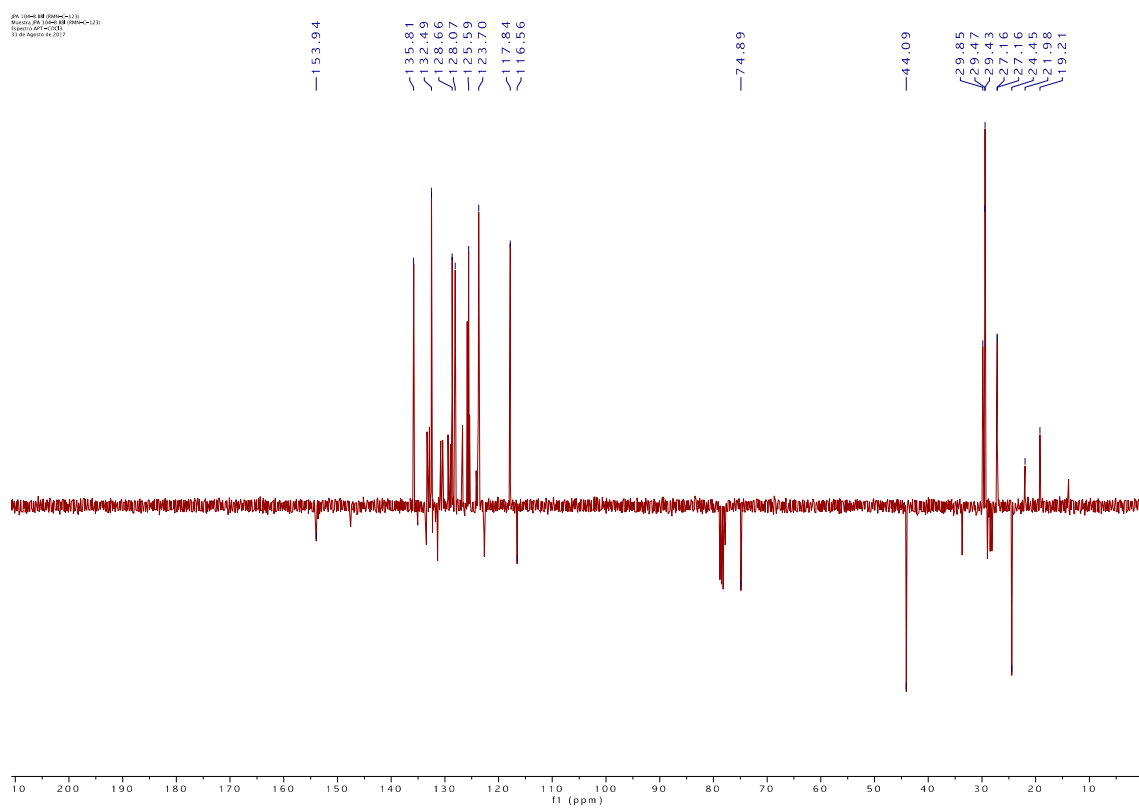

**Figure S14.** APT spectra of 1-(2,2-dimethyl-chroman-6-yl)-3,7-dimethyl-octa-2,6-dien-1-ol (7).

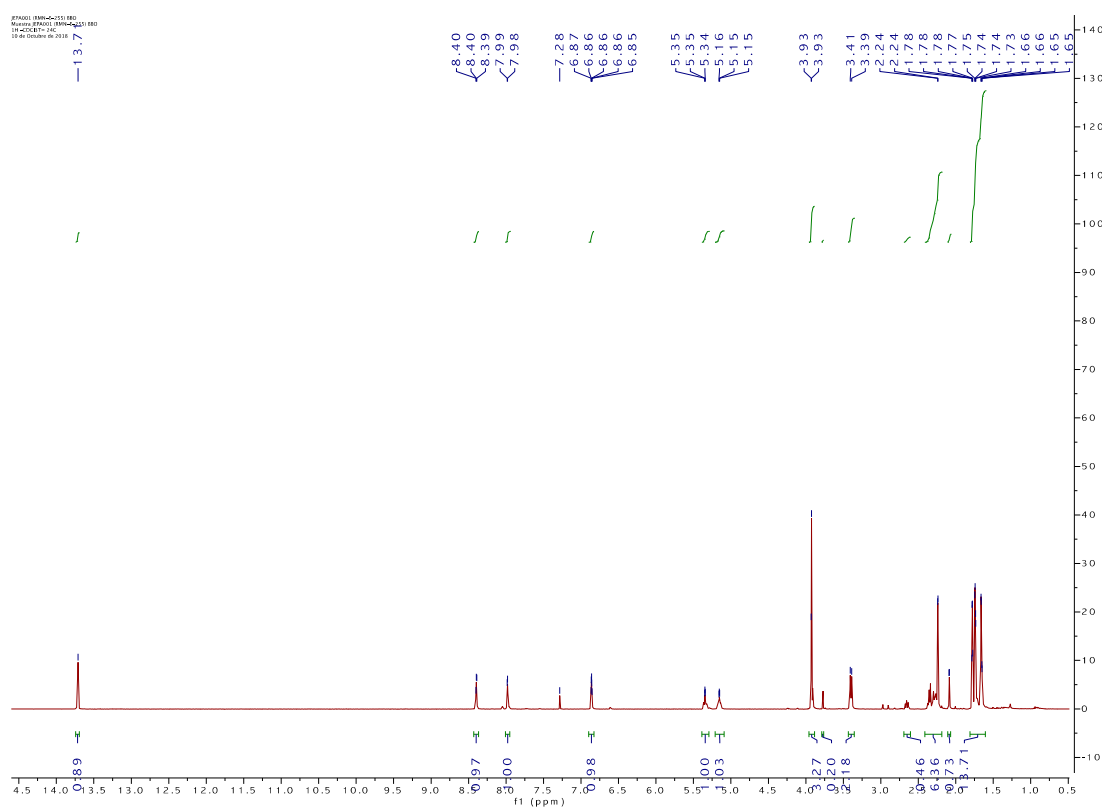

**Figure S15.** <sup>1</sup>H-NMR spectra of methyl (E)-3-(3,7-dimethylocta-2,6-dienoyl)-4-hydroxy-5-(3-methylbut-2-en-1-yl)benzoate (8).



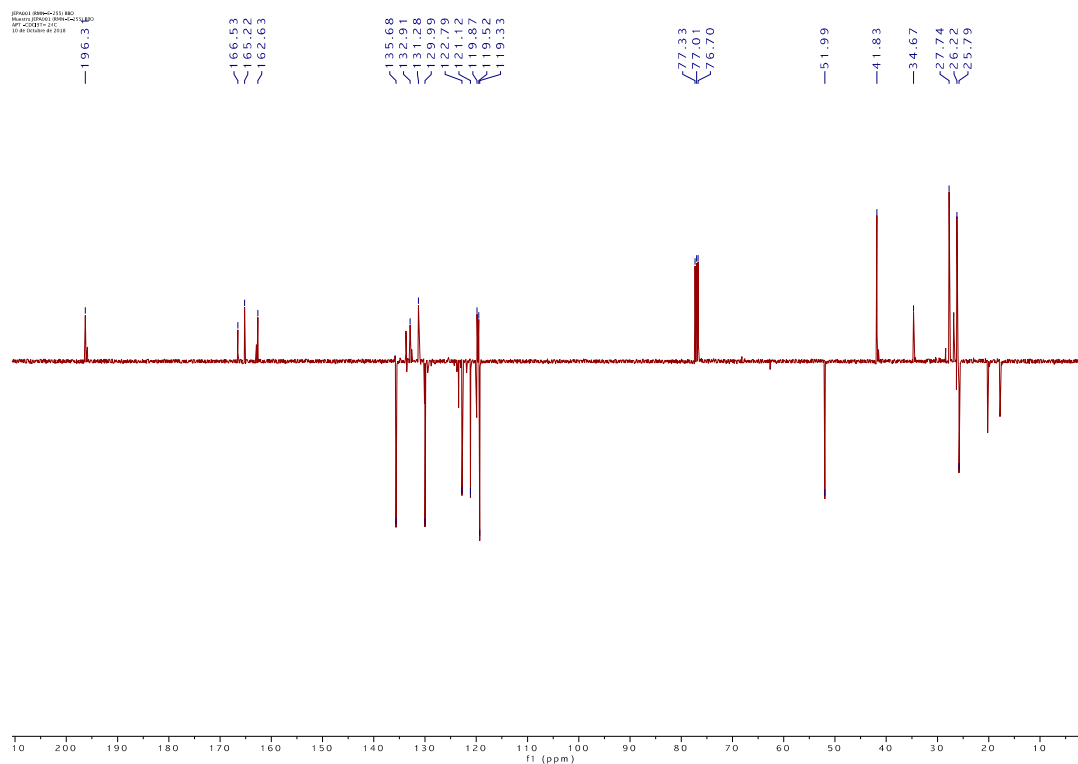

Figure S16. APT spectra of methyl (E)-3-(3,7-dimethylocta-2,6-dienoyl)-4-hydroxy-5-(3-methylbut-2-en-1-yl)benzoate (8).

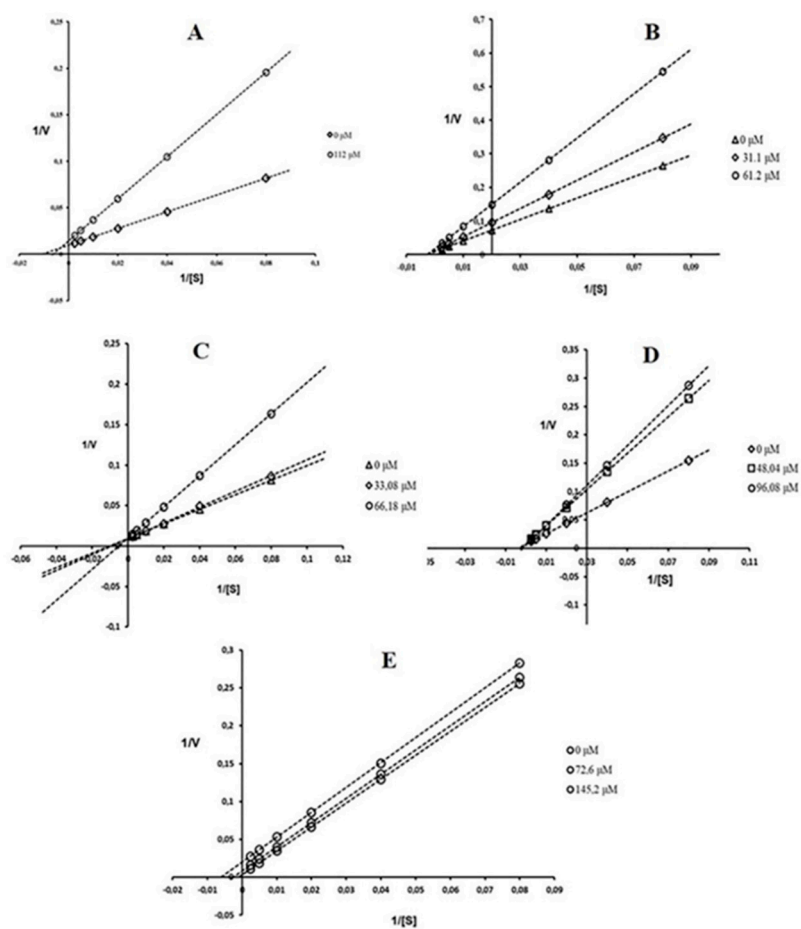

Figure S17. Mechanisms of inhibition of the catalytic activity of the PL.

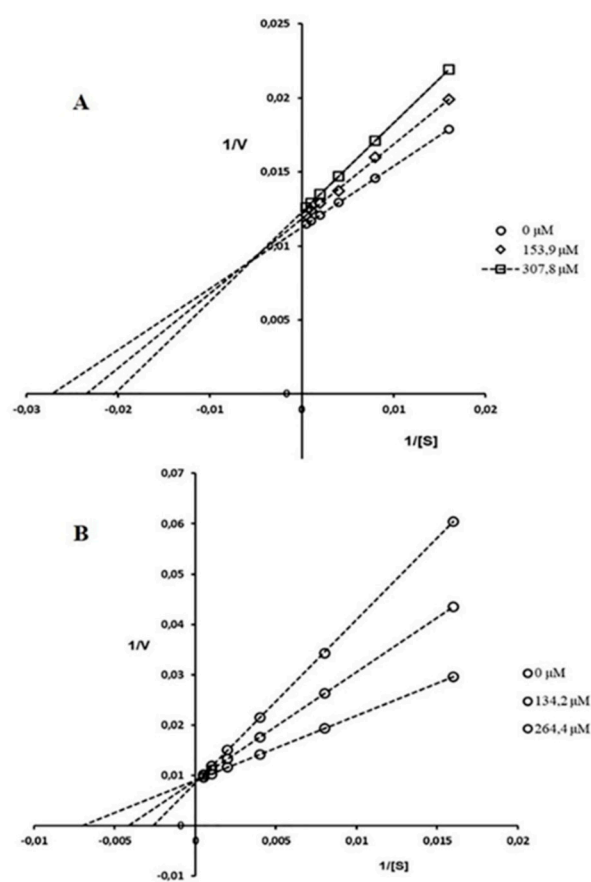

Figure S18. Mechanisms of inhibition of the catalytic activity of the AG.

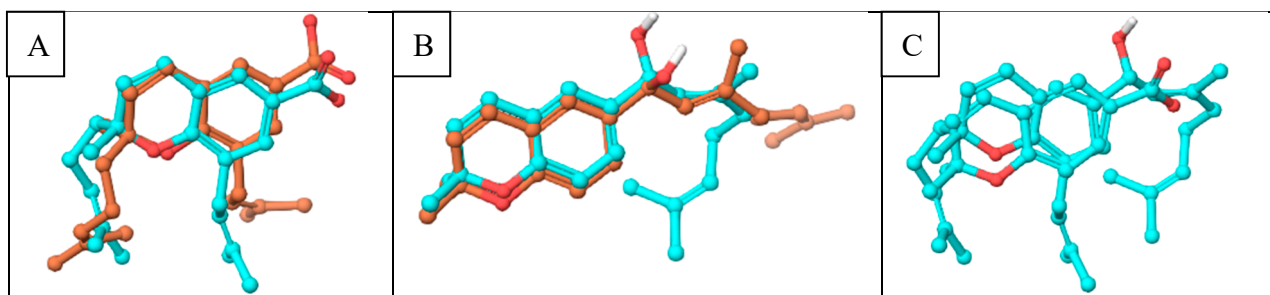

Figure S19. Superposition of docked conformations of *R* and *S* enantiomers, PL competitive inhibitors. A. 3*R*(cyan) and 3*S* (brown); B. 7*R* (cyan) and 7*S* (brown); C. 3*R* and 7*R*.

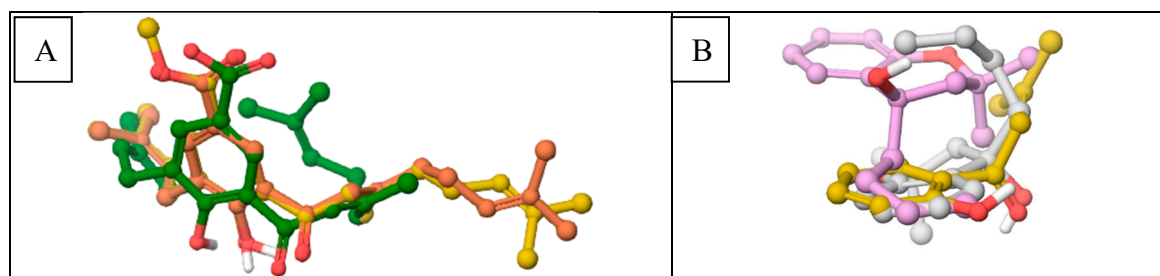

Figure S20. Superposition of docked conformations of PL inhibitors. A. 1 (orange), 2 (green) and 8 (yellow). B. 5 (Yellow), 6*R* (pink), and 6*S* (grey).

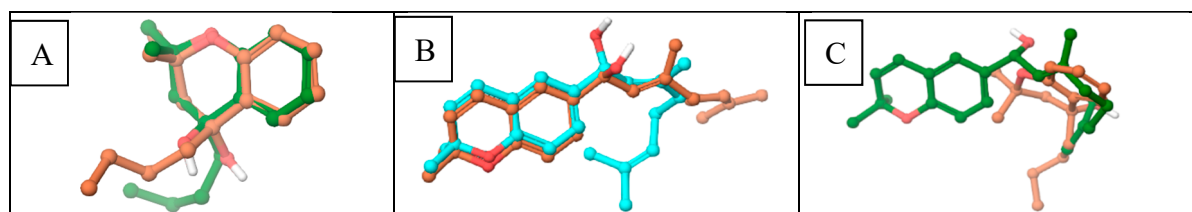

**Figure S21.** Superposition of docked conformations of AG inhibitors. A. **6R** (cyan) and **6S** (brown). B. **7R** (Yellow) **7S**. C. **6R** (orange), and **7R** (green).

**Table S1.** Binding free energies predicted by molecular docking between pancreatic lipase,  $\alpha$ -glucosidase, and its compounds.

| Compound | Pancreatic Lipase (LP)    |                 |                 | Alpha-Glucosidase (AG)    |                 |                 |
|----------|---------------------------|-----------------|-----------------|---------------------------|-----------------|-----------------|
|          | Catalytic site            | Allosteric site | Inhibition type | Catalytic site            | Allosteric site | Inhibition type |
|          | Binding energy (Kcal/mol) |                 |                 | Binding energy (Kcal/mol) |                 |                 |
| 1        | --                        | -7,3            | UC              | --                        | --              | --              |
| 2        | --                        | -6,2            | UC              | --                        | --              | --              |
| 3R       | -8,7                      | --              | C               | --                        | --              | --              |
| 3S       | -8,6                      | --              | C               | --                        | --              | --              |
| 5        | --                        | -6,0            | NC              | --                        | --              | --              |
| 6R       | --                        | -6,6            | NC              | --                        | -6,1            | M               |
| 6S       | --                        | -6,3            | NC              | --                        | -6,0            | M               |
| 7R       | -8,9                      | --              | C               | --                        | -7,8            | NC              |
| 7S       | -8,7                      | --              | C               | --                        | -7,8            | NC              |
| 8        | --                        | -7,3            | M               | --                        | --              | --              |

**Table S2.** Type of interactions in the binding sites of pancreatic lipase and  $\alpha$ -glucosidase.

| Interaction       |     |                       |     |     |     |     |     |     |     |                 |                   |                       |           |            |            |                |        |            |            |     |  |
|-------------------|-----|-----------------------|-----|-----|-----|-----|-----|-----|-----|-----------------|-------------------|-----------------------|-----------|------------|------------|----------------|--------|------------|------------|-----|--|
| Pancreatic Lipase |     |                       |     |     |     |     |     |     |     | α-Glucosidase   |                   |                       |           |            |            |                |        |            |            |     |  |
| Compound          |     | Aminoacid interaction |     |     |     |     |     |     |     | Compound        |                   | Aminoacid interaction |           |            |            |                |        |            |            |     |  |
| Catalytic Site    |     |                       |     |     |     |     |     |     |     | Allosteric site |                   |                       |           |            |            |                |        |            |            |     |  |
| 3R                | 77  | 78                    | 79  | 152 | 178 | 215 | 256 | 259 | 260 | 263             | 6R                | 636                   | 636       | 639        | 653        | 676            | 733    | 732        | 765        | 766 |  |
|                   | Phe | Ile                   | Asp | Ser | Ala | Phe | Arg | Ala | Ala | His             |                   | Tyr                   | Tyr       | Thr        | Arg        | Pro            | Tyr    | Gly        | Lys        | Gly |  |
| 3S                | 77  | 78                    | 79  | 152 | 178 | 215 | 256 | 259 | 260 | 263             | 6S                | 636                   | 639       | 640        | 653        | 676            | 733    | 732        | 766        | 767 |  |
|                   | Phe | Ile                   | Asp | Ser | Ala | Phe | Arg | Ala | Ala | His             |                   | Tyr                   | Thr       | Leu        | Arg        | Pro            | Tyr    | Gly        | Gly        | Glu |  |
| 7R                | 77  | 78                    | 79  | 152 | 178 | 215 | 256 | 259 | 260 | 263             | 7R                | 271                   | 269       | 639        | 640        | 649            | 653    | 733        | 766        | 767 |  |
|                   | Phe | Ile                   | Asp | Ser | Ala | Phe | Arg | Ala | Ala | His             |                   | Glu                   | Thr       | Thr        | Leu        | Asp            | Arg    | Tyr        | Gly        | Glu |  |
| 7S                | 77  | 78                    | 79  | 152 | 178 | 215 | 256 | 259 | 260 | 263             | 7S                | 271                   | 269       | 639        | 640        | 649            | 653    | 733        | 766        | 767 |  |
|                   | Phe | Ile                   | Asp | Ser | Ala | Phe | Arg | Ala | Ala | His             |                   | Glu                   | Thr       | Thr        | Leu        | Asp            | Arg    | Tyr        | Gly        | Glu |  |
| Allosteric Site   |     |                       |     |     |     |     |     |     |     | Key data        |                   |                       |           |            |            |                |        |            |            |     |  |
| 1                 | 41  | 42                    | 64  | 229 | 235 | 337 | 369 | 386 | 387 | 389             | Interaction type  |                       |           |            |            |                |        |            |            |     |  |
|                   | Leu | Lys                   | Glu | Asn | Pro | Arg | Tyr | Phe | Ash | Asp             | Pi-Pi             |                       |           |            |            |                | polar  |            |            |     |  |
| 2                 | 41  | 42                    | 64  | 229 | 235 | 337 | 369 | 386 | 387 | 389             | Hydrophobics      |                       |           |            |            |                | H-bond |            |            |     |  |
|                   | Leu | Lys                   | Glu | Asn | Pro | Arg | Tyr | Phe | Ash | Asp             |                   |                       |           |            |            |                |        |            |            |     |  |
| 5                 | 25  | 41                    | 42  | 64  | 65  | 367 | 368 |     |     |                 | Pancreatic lipase |                       |           |            |            | α-glucosidase  |        |            |            |     |  |
|                   | Ser | Leu                   | Lys | Glu | Arg | Lys | Gln |     |     |                 | Catalytic site    |                       | 77<br>Phe | 263<br>His | 152<br>Ser | Catalytic site |        | 327<br>Asp | 443<br>Asp |     |  |
| 6R                | 25  | 41                    | 42  | 64  | 65  | 367 | 368 | 369 | 370 | 403             |                   |                       |           |            |            |                |        |            |            |     |  |
|                   | Ser | Leu                   | Lys | Glu | Arg | Lys | Gln | Tyr | Glu | Tyr             |                   |                       |           |            |            |                |        |            |            |     |  |
| 6S                | 25  | 26                    | 41  | 42  | 64  | 65  | 356 | 367 | 368 |                 |                   |                       |           |            |            |                |        |            |            |     |  |
|                   | Ser | Asn                   | Leu | Lys | Glu | Arg | Leu | Lys | Gln |                 |                   |                       |           |            |            |                |        |            |            |     |  |
| 8                 | 41  | 42                    | 64  | 229 | 328 | 329 | 369 | 386 | 387 | 389             |                   |                       |           |            |            |                |        |            |            |     |  |
|                   | Leu | Lys                   | Glu | Asn | Asp | Thr | Tyr | Phe | Ash | Asp             |                   |                       |           |            |            |                |        |            |            |     |  |
